# Supplementary material
Source: MDPI journal article supplement (https://www.mdpi.com/2073-4395/14/5/1080)
Supplement: s1 [file s1]

**Table S1.** Gene specific primers used in this study.

| <b>Transcript_ID or<br/>GenBank<br/>accession no.</b> | <b>Annotation</b>                             | <b>Forward</b>           | <b>Reverse</b>         |
|-------------------------------------------------------|-----------------------------------------------|--------------------------|------------------------|
| <i>Sita101774958</i>                                  | Ribulose biphosphate carboxylase<br>(Rubisco) | CGGGTGTACGACGACGAG       | TCTTGGGCTGCTGGAACG     |
| <i>Sita101770259</i>                                  | Ribulose biphosphate carboxylase<br>(Rubisco) | TCCCCTGCCTCGAGTTCA       | CAGTAGCGCCCGTCGTAG     |
| <i>Sita101764983</i>                                  | Ribulose biphosphate carboxylase<br>(Rubisco) | GACGTTCGACCAGCCCAA       | TACTTGTCGGCCAGCTGC     |
| <i>Sita101759319</i>                                  | Sucrose phosphate synthase (SPS)              | TCACCGGCTACGACGAGA       | GGCGCGTGTTCTTCTCCT     |
| <i>Sita101781780</i>                                  | Sucrose phosphate synthase (SPS)              | TACGAGGAGCTGCTGGGT       | GCCCTCAACGCCGATGAT     |
| <i>Sita101752535</i>                                  | Sucrose phosphate synthase (SPS)              | TCGCAAACCTAACGCTGATACTGG | CGTCGGTCTGGTTGTGGTGCTT |
| <i>Sita101771800</i>                                  | ADP-glucose pyrophosphorylase<br>(AGPase)     | ACTCCCTTTGTCCCTCCCTCT    | AAGGCAGGCAGGATGATGAG   |
| <i>Sita101786779</i>                                  | Granule-bound starch synthase (GBSS)          | AGGAGGGCATCACCGGAT       | ATCACATGGAACGCCGGG     |
| <i>Sita101758779</i>                                  | Starch synthase (SS)                          | CAAGGTACAGGGTGGGCG       | CCCCGCTTCATGAGTCCC     |
| <i>Sita101785561</i>                                  | Starch synthase (SS)                          | GCTGAACCGGTGGAAGCT       | GAAGCCACCACGACGACA     |
| <i>Sita101761472</i>                                  | Starch synthase (SS)                          | CCCAGTGGTTCATGCGGT       | AGTGCCCTAGAGCGTCGA     |
| <i>Sita101774804</i>                                  | Starch synthase (SS)                          | CCTTTACGACACCGTCTTTG     | TTGAACCAGTCACGAGCATC   |

|                      |                               |                              |                            |
|----------------------|-------------------------------|------------------------------|----------------------------|
| <i>Sita101762615</i> | Sucrose synthase (SuSy)       | TGTCAACCTTGTAGTCGTGGGA       | CGGTCTGTCTGGGCTCTTAT       |
| <i>Sita101783222</i> | Sucrose synthase (SuSy)       | TCCCTCTCCGCTCATCCC           | CAGCCTCAGGGATAGCGC         |
| <i>Sita101774900</i> | Invertase (INV)               | GATGTGACTGAGGAGGTCTTG        | TGTTATTGAGGGCACGGATT       |
| <i>Sita101765478</i> | Invertase (INV)               | AATGGACTTCCGCTGGTTCGC        | CCCGTCACAATCTGCCACTCG      |
| <i>Sita101770954</i> | Invertase (INV)               | GAACGACCCGTCCACCAG           | TGCAAGGTGTGGAGCAGG         |
| <i>Sita101760744</i> | Nitrate reductase (NR)        | GGGCTACACCATGAAAGGATACG<br>C | GGACCAGAAGCACCAGCACCA<br>G |
| <i>Sita101773167</i> | Nitrate reductase (NR)        | GCACCCAAATGAAGCCTAAC         | TGGAGTCCAATCCAGCGAAT       |
| <i>Sita101772334</i> | Glutamine synthetase (GS)     | GGAGTTCCAAGTCGGCCC           | CACCAGGGATGGGCTTGG         |
| <i>Sita101764285</i> | Glutamine synthetase (GS)     | AGGGCAAGCTCCAGGAGA           | GGTTCCCCAGCTGGTGTG         |
| <i>Sita101785947</i> | Glutamate synthase (GOGAT)    | AAGCTCAGGTGCTGGCTG           | CCAATGCTTCGCGCCATC         |
| <i>Sita101770266</i> | Glutamate synthase (GOGAT)    | TTGGGCAATCGCAGAGGG           | ATGCCGCGACAGGTTGAA         |
| <i>Sita101778373</i> | Glutamate dehydrogenase (GDH) | CATGACACGCGCCTTTGG           | GTTGACGCCGAGGGTGAA         |
| <i>Sita101755619</i> | Glutamate dehydrogenase (GDH) | ACGGATGTCCCAGCTCCT           | GGGGAGTGGCCATGGAAC         |
| <i>SiActin</i>       | SETIT_026509mg                | CGCATATGTGGCTCTTGACT         | GGGCACCTAAATCTCTCTGC       |

**Table S2.** Composition and dosage of qRT-PCR reaction system.

| Reagent                   | Dosage       |
|---------------------------|--------------|
| TB Green Premix Ex Taq II | 5.0 $\mu$ L  |
| Forward Primer            | 0.5 $\mu$ L  |
| Reverse Primer            | 0.5 $\mu$ L  |
| cDNA                      | 1.0 $\mu$ L  |
| dd H <sub>2</sub> O       | 3.0 $\mu$ L  |
| Total                     | 10.0 $\mu$ L |

**Table S3.** Program used for qRT-PCR.

| Program                              | T <sub>m</sub>          | Time |
|--------------------------------------|-------------------------|------|
| Step 1 (predegeneration)             | 95°C                    | 30 s |
| Step 2 (degeneration)                | 95°C                    | 5 s  |
| Step 3 (Genetic annealing extension) | T <sub>m</sub> °C       | 30 s |
| Go to step 2                         | 39 Cycles               |      |
| Step 4 (dissolution curve)           | 60°C (5s) to 95°C; End. |      |
